# Supplementary material for: Behavioral and Self-reported Data Collected From Smartphones for the Assessment of Depressive and Manic Symptoms in Patients With Bipolar Disorder: Prospective Observational Study
Source: PubMed Central journal article supplement (PMC8811705; doi:10.2196/28647), 2022-01-19
Supplement: jmir_v24i1e28647_app2.pdf [file jmir_v24i1e28647_app2.pdf]

Regression coefficients from mixed models with changed ground truth for the analyses (3 days before visit and the day of the visit) to describe relation between smartphone-based data<sup>a</sup> collected using the BDmon application and depressive and manic symptoms assessed with the HDRS and YMRS, respectively.

| Parameter                                            | Depressive symptoms (HDRS) |                 |                           |               | Manic symptoms (YMRS) |                 |                           |              | Number of Observations (patient-days) | Number of groups (patients) |
|------------------------------------------------------|----------------------------|-----------------|---------------------------|---------------|-----------------------|-----------------|---------------------------|--------------|---------------------------------------|-----------------------------|
|                                                      | Regression coef.           | P               | Confidence interval (95%) |               | Regression coef.      | P               | Confidence interval (95%) |              |                                       |                             |
|                                                      |                            |                 | lower limit               | upper limit   |                       |                 | lower limit               | upper limit  |                                       |                             |
| Number of incoming answered calls                    | -0.099                     | .177            | -0.245                    | 0.045         | -0.11                 | .202            | -0.278                    | 0.059        | 382                                   | 46                          |
| Duration of incoming calls [s]                       | 0.001                      | .246            | -0.001                    | 0.002         | 0.001                 | .893            | -0.001                    | 0.002        | 317                                   | 44                          |
| Standard deviation of duration of incoming calls [s] | 0.001                      | .403            | -0.001                    | 0.003         | 0.002                 | .183            | -0.001                    | 0.004        | 226                                   | 40                          |
| Number of outgoing calls                             | -0.041                     | .211            | -0.106                    | 0.023         | -0.027                | .482            | -0.102                    | 0.049        | 382                                   | 46                          |
| Fraction of outgoing calls                           | -1.039                     | .361            | -3.267                    | 1.187         | 0.433                 | .741            | -2.127                    | 3.019        | 348                                   | 46                          |
| Duration of outgoing calls [s]                       | 0.001                      | .364            | -0.001                    | 0.002         | 0.001                 | .412            | -0.001                    | 0.003        | 348                                   | 46                          |
| Standard deviation of duration of outgoing calls [s] | 0.001                      | .440            | -0.001                    | 0.003         | <b>0.004</b>          | <b>.004</b>     | <b>0.001</b>              | <b>0.006</b> | 300                                   | 44                          |
| Number of missed calls                               | 0.071                      | .416            | -0.101                    | 0.243         | <b>0.252</b>          | <b>.015</b>     | <b>0.05</b>               | <b>0.453</b> | 382                                   | 46                          |
| Fraction of missed calls                             | <b>4.944</b>               | <b>.008</b>     | <b>1.338</b>              | <b>8.585</b>  | 2.742                 | .259            | -2.073                    | 7.487        | 232                                   | 42                          |
| Number of sent text messages                         | 0.024                      | .086            | -0.003                    | 0.052         | <b>0.132</b>          | <b>&lt;.001</b> | <b>0.103</b>              | <b>0.162</b> | 382                                   | 46                          |
| Mean length of text messages [# of chr]              | 0.001                      | .835            | -0.012                    | 0.015         | <b>0.046</b>          | <b>&lt;.001</b> | <b>0.024</b>              | <b>0.068</b> | 127                                   | 23                          |
| Self-assessment of sleep time                        | <b>-0.453</b>              | <b>.018</b>     | <b>-0.821</b>             | <b>-0.082</b> | -0.253                | .098            | -0.555                    | 0.043        | 103                                   | 31                          |
| Self-assessment of mood                              | <b>-1.614</b>              | <b>&lt;.001</b> | <b>-2.135</b>             | <b>-1.09</b>  | <b>0.43</b>           | <b>.028</b>     | <b>0.052</b>              | <b>0.817</b> | 106                                   | 32                          |

<sup>a</sup> In total, 382 patients-days of data collected from smartphones of 46 patients were relevant for this analysis
