# Supplementary material for: Behavioral and Self-reported Data Collected From Smartphones for the Assessment of Depressive and Manic Symptoms in Patients With Bipolar Disorder: Prospective Observational Study
Source: PubMed Central journal article supplement (PMC8811705; doi:10.2196/28647), 2022-01-19
Supplement: jmir_v24i1e28647_app3.pdf [file jmir_v24i1e28647_app3.pdf]

Regression coefficients from mixed models to describe relation between smartphone-based data collected using the BDmon application and depressive and manic symptoms assessed with the HDRS and YMRS, respectively with changed cut-off points on the HDRS and YMRS scales<sup>a</sup>.

| Parameter                                            | A. Euthymia vs Depression |                 |                         |                |                                              |                                              | B. Euthymia vs Mania     |             |                         |                |                                          |                                                  |
|------------------------------------------------------|---------------------------|-----------------|-------------------------|----------------|----------------------------------------------|----------------------------------------------|--------------------------|-------------|-------------------------|----------------|------------------------------------------|--------------------------------------------------|
|                                                      | Regression<br>coeff.      | P               | Confidence<br>intervals |                | Nu<br>mber<br>of<br>Obs<br>erva<br>tion<br>s | Numbe<br>r<br>of<br>groups<br>(patient<br>s) | Regres<br>sion<br>coeff. | P           | Confidence<br>intervals |                | Num<br>ber<br>of<br>Obs<br>erva<br>tions | Num<br>ber<br>of<br>group<br>s<br>(patie<br>nts) |
|                                                      |                           |                 | lower<br>limit          | upper<br>limit |                                              |                                              |                          |             | lower<br>limit          | upper<br>limit |                                          |                                                  |
| Number of incoming answered calls                    | <b>-0.156</b>             | <b>&lt;.001</b> | <b>-0.157</b>           | <b>-0.155</b>  | 877                                          | 49                                           | -0.041                   | .438        | -0.146                  | 0.063          | 761                                      | 47                                               |
| Duration of incoming calls [s]                       | 0                         | .279            | 0                       | 0.001          | 735                                          | 48                                           | <b>0.001</b>             | <b>.046</b> | <b>0</b>                | <b>0.003</b>   | 647                                      | 45                                               |
| Standard deviation of duration of incoming calls [s] | 0                         | .862            | -0.001                  | 0.001          | 539                                          | 46                                           | 0.001                    | .217        | 0                       | 0.002          | 488                                      | 42                                               |
| Number of outgoing calls                             | <b>-0.073</b>             | <b>.010</b>     | <b>-0.129</b>           | <b>-0.017</b>  | 877                                          | 49                                           | 0.009                    | .472        | -0.015                  | 0.033          | 761                                      | 47                                               |
| Fraction of outgoing calls                           | -0.298                    | .701            | -1.821                  | 1.224          | 788                                          | 49                                           | 1.805                    | .124        | -0.498                  | 4.109          | 696                                      | 46                                               |
| Duration of outgoing calls [s]                       | <b>0.002</b>              | <b>.024</b>     | <b>0</b>                | <b>0.003</b>   | 788                                          | 49                                           | 0.001                    | .375        | -0.001                  | 0.002          | 696                                      | 46                                               |
| Standard deviation of duration of outgoing calls [s] | 0.001                     | .154            | 0                       | 0.002          | 666                                          | 46                                           | 0.002                    | .059        | 0                       | 0.003          | 606                                      | 44                                               |
| Number of missed calls                               | <b>-0.013</b>             | <b>&lt;.001</b> | <b>-0.014</b>           | <b>-0.011</b>  | 877                                          | 49                                           | 0.096                    | .153        | -0.036                  | 0.227          | 761                                      | 47                                               |
| Fraction of missed calls                             | <b>2.547</b>              | <b>.022</b>     | <b>0.362</b>            | <b>4.731</b>   | 508                                          | 48                                           | <b>4.289</b>             | <b>.010</b> | <b>1.022</b>            | <b>7.557</b>   | 448                                      | 46                                               |
| Number of sent text messages                         | <b>0.057</b>              | <b>&lt;.001</b> | <b>0.055</b>            | <b>0.058</b>   | 877                                          | 49                                           | <b>0.033</b>             | <b>.005</b> | <b>0.01</b>             | <b>0.056</b>   | 761                                      | 47                                               |
| Mean length of text messages [# of chr]              | 0.008                     | .301            | -0.007                  | 0.022          | 289                                          | 32                                           | <b>0.028</b>             | <b>.011</b> | <b>0.006</b>            | <b>0.049</b>   | 247                                      | 32                                               |
| Self-assessment of sleep time                        | -0.035                    | .692            | -0.206                  | 0.137          | 243                                          | 36                                           | -0.425                   | .338        | -1.296                  | 0.445          | 206                                      | 37                                               |
| Self-assessment of mood                              | <b>-0.778</b>             | <b>&lt;.001</b> | <b>-1.152</b>           | <b>-0.404</b>  | 247                                          | 39                                           | 1.83                     | .154        | -0.687                  | 4.348          | 206                                      | 38                                               |

<sup>a</sup> Euthymic state was define as a Hamilton Depression Rating Scale 17-items (HDRS-17) score < 13 and a Young Mania Rating Scale (YMRS) score < 13. A depressive state was define as a HDRS-17 score ≥ 13 and an YMRS score < 13. Manic state was defined as an YMRS score ≥ 13. Mixed state with higher cut offs was excluded from this analysis due to the relatively small sample size. In total, only 19 patient-days of the mixed state were reported for 2 patients.
