# Supplementary material for: Behavioral and Self-reported Data Collected From Smartphones for the Assessment of Depressive and Manic Symptoms in Patients With Bipolar Disorder: Prospective Observational Study
Source: PubMed Central journal article supplement (PMC8811705; doi:10.2196/28647), 2022-01-19
Supplement: jmir_v24i1e28647_app7.pdf [file jmir_v24i1e28647_app7.pdf]

|                 |                                                      | Euthymia     |       |       | Depression   |       |       | Mania        |       |       | Mixed state  |       |       |
|-----------------|------------------------------------------------------|--------------|-------|-------|--------------|-------|-------|--------------|-------|-------|--------------|-------|-------|
|                 | Variable                                             | Patient-days | Mean  | SD    | Patient-days | Mean  | SD    | Patient-days | Mean  | SD    | Patient-days | Mean  | SD    |
| Phone calls     | Number of incoming answered calls                    | 445          | 3.9   | 3.8   | 344          | 2.4   | 2.6   | 122          | 3.2   | 4.3   | 71           | 2.4   | 2.1   |
|                 | Duration of incoming calls [s]                       | 390          | 188.0 | 225.0 | 274          | 252.3 | 373.8 | 98           | 191.3 | 237.5 | 58           | 194.4 | 232.2 |
|                 | Standard deviation of duration of incoming calls [s] | 302          | 212.5 | 248.8 | 188          | 282.1 | 421.6 | 73           | 189.0 | 280.9 | 37           | 262.3 | 361.1 |
|                 | Number of outgoing calls                             | 445          | 8.5   | 9.2   | 344          | 5.2   | 6.8   | 122          | 10.4  | 21.4  | 71           | 6.6   | 6.9   |
|                 | Fraction of outgoing calls                           | 416          | 0.7   | 0.2   | 299          | 0.7   | 0.2   | 110          | 0.7   | 0.2   | 61           | 0.7   | 0.2   |
|                 | Duration of outgoing calls [s]                       | 416          | 133.8 | 219.7 | 299          | 165.4 | 229.5 | 110          | 108.6 | 229.2 | 61           | 218.5 | 312.3 |
|                 | Standard deviation of duration of outgoing calls [s] | 365          | 189.8 | 241.8 | 238          | 214.8 | 250.1 | 98           | 119.9 | 155.8 | 55           | 290.8 | 331.7 |
|                 | Number of missed calls                               | 445          | 2.0   | 2.9   | 344          | 1.5   | 2.1   | 122          | 1.8   | 2.9   | 71           | 2.2   | 3.0   |
|                 | Fraction of missed calls                             | 268          | 0.2   | 0.1   | 195          | 0.3   | 0.2   | 77           | 0.2   | 0.2   | 42           | 0.3   | 0.2   |
| Short messages  | Number of sent text messages                         | 445          | 3.5   | 10.7  | 344          | 2.2   | 6.2   | 122          | 2.9   | 6.2   | 71           | 15.0  | 37.0  |
|                 | Mean length of text messages [# of chr]              | 147          | 51.4  | 49.0  | 118          | 53.6  | 41.5  | 45           | 57.4  | 67.4  | 33           | 65.3  | 41.0  |
| Self-assessment | Self-assessment of sleep time                        | 120          | 8.5   | 1.9   | 99           | 7.8   | 3.1   | 27           | 6.6   | 2.1   | 24           | 7.9   | 2.8   |
|                 | Self-assessment of mood                              | 121          | -0.2  | 1.0   | 103          | -1.3  | 1.8   | 23           | 0.8   | 1.4   | 21           | -1.1  | 1.5   |

<sup>a</sup> The state of euthymia (E) was defined as HDRS < 8, YMRS < 6, depression (D): HDRS ≥ 8 and YMRS < 6, hypomania/mania (M): HDRS < 8, YMRS ≥ 6,

mixed state (X): HDRS ≥ 8, YMRS ≥ 6
