# Supplementary material for: Behavioral and Self-reported Data Collected From Smartphones for the Assessment of Depressive and Manic Symptoms in Patients With Bipolar Disorder: Prospective Observational Study
Source: PubMed Central journal article supplement (PMC8811705; doi:10.2196/28647), 2022-01-19

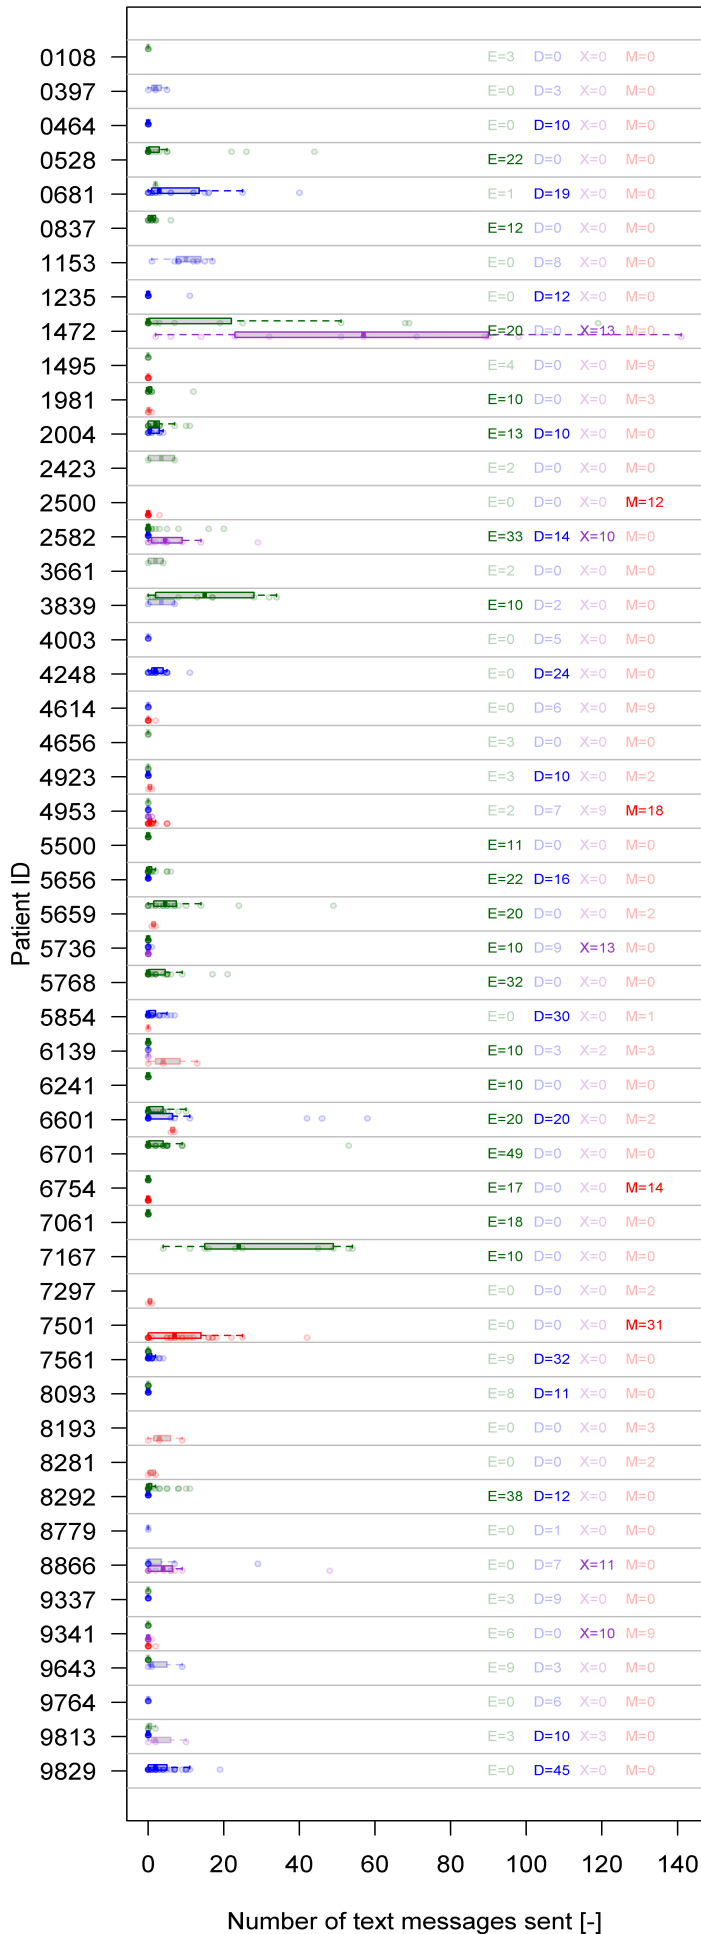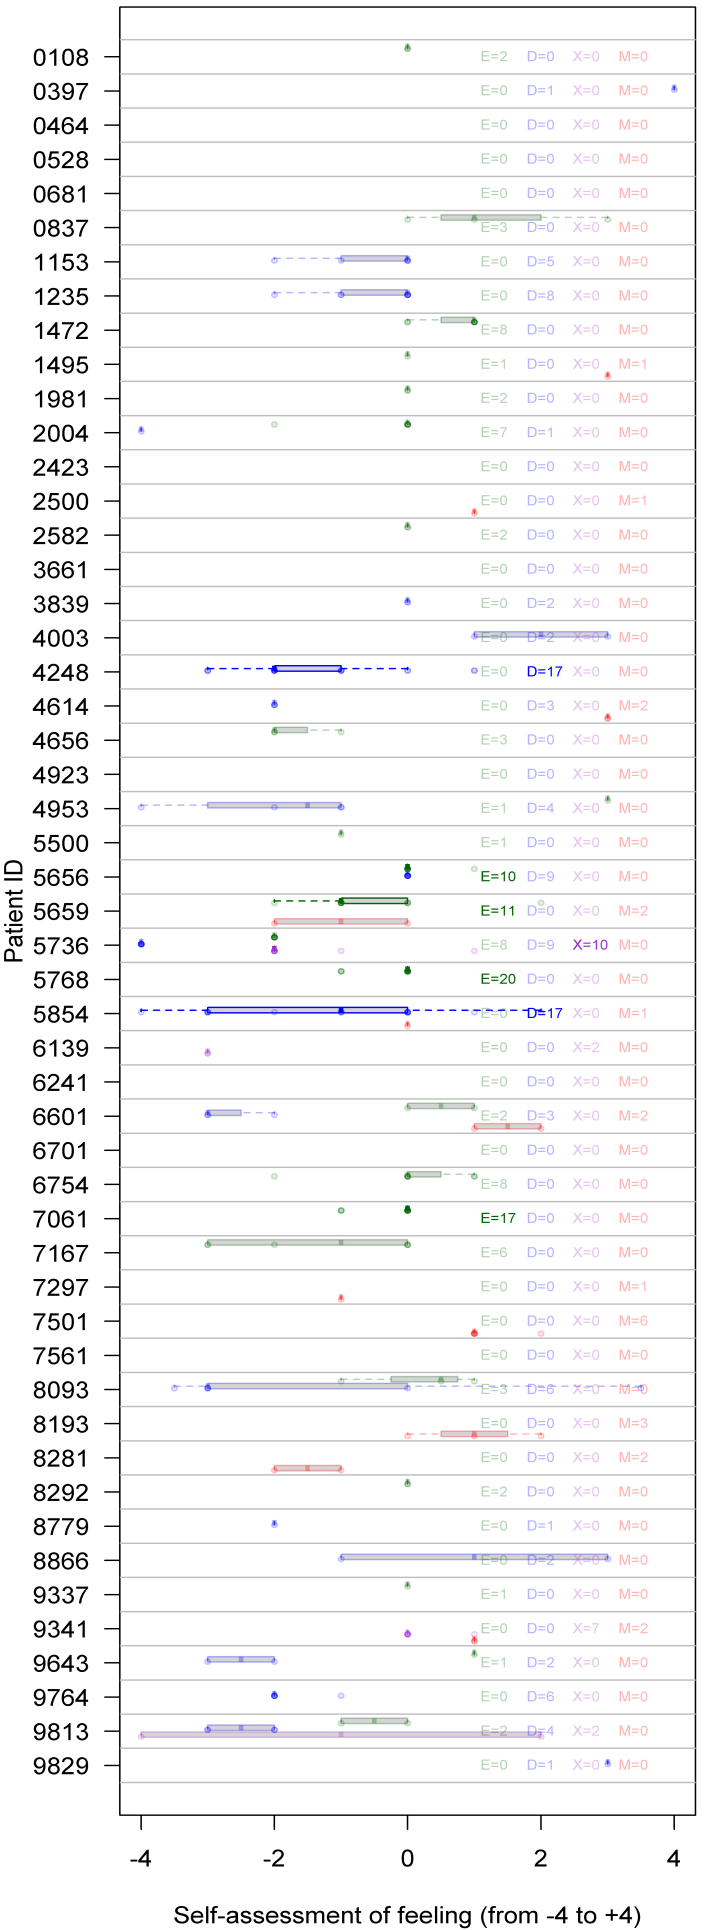

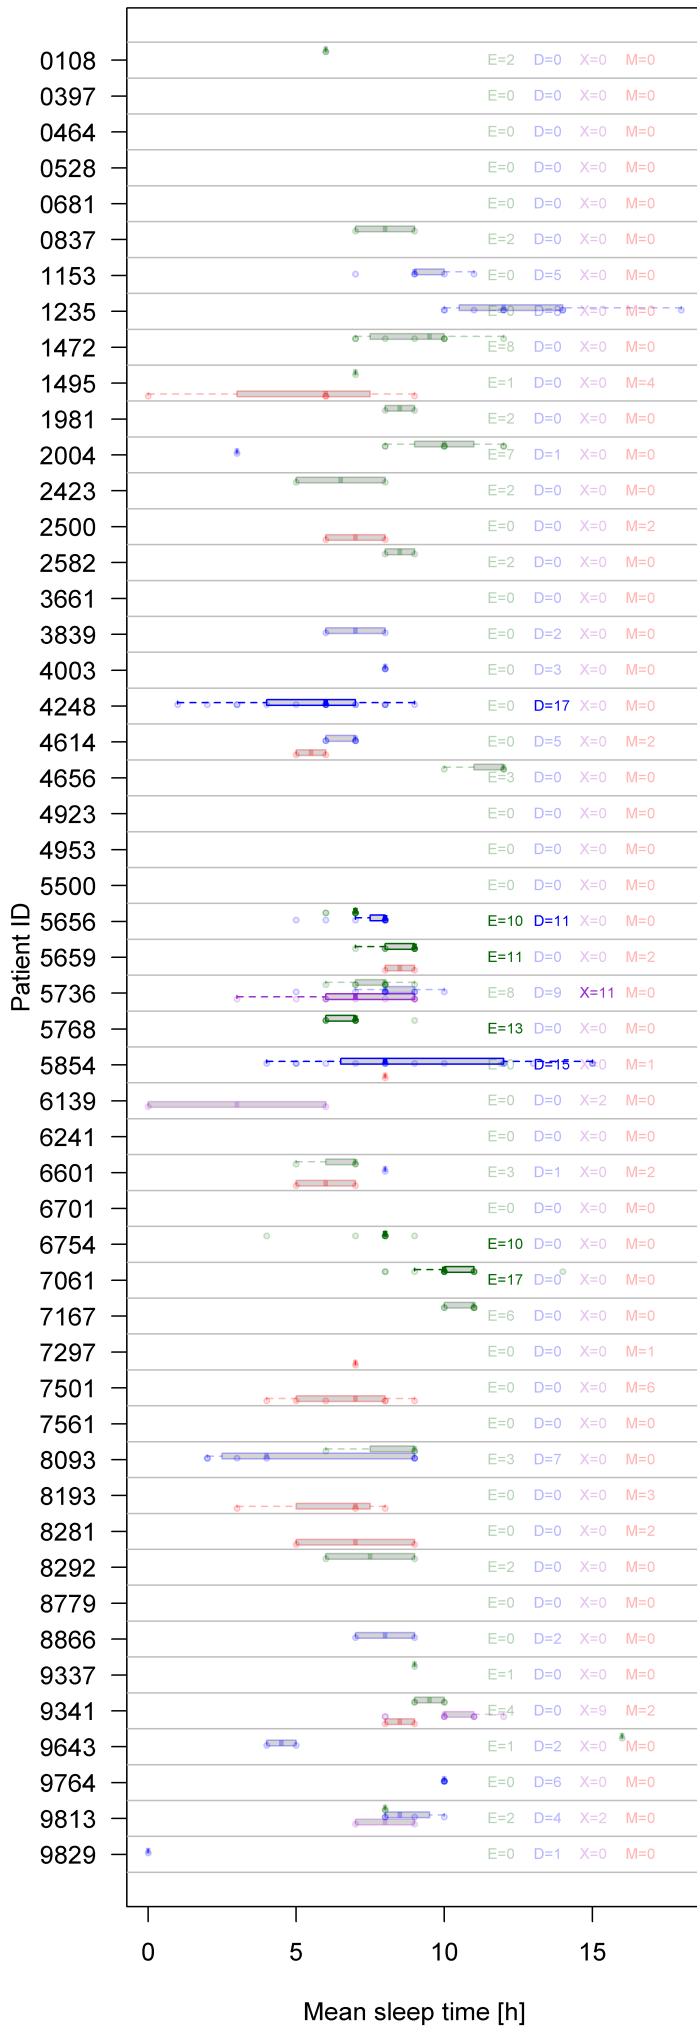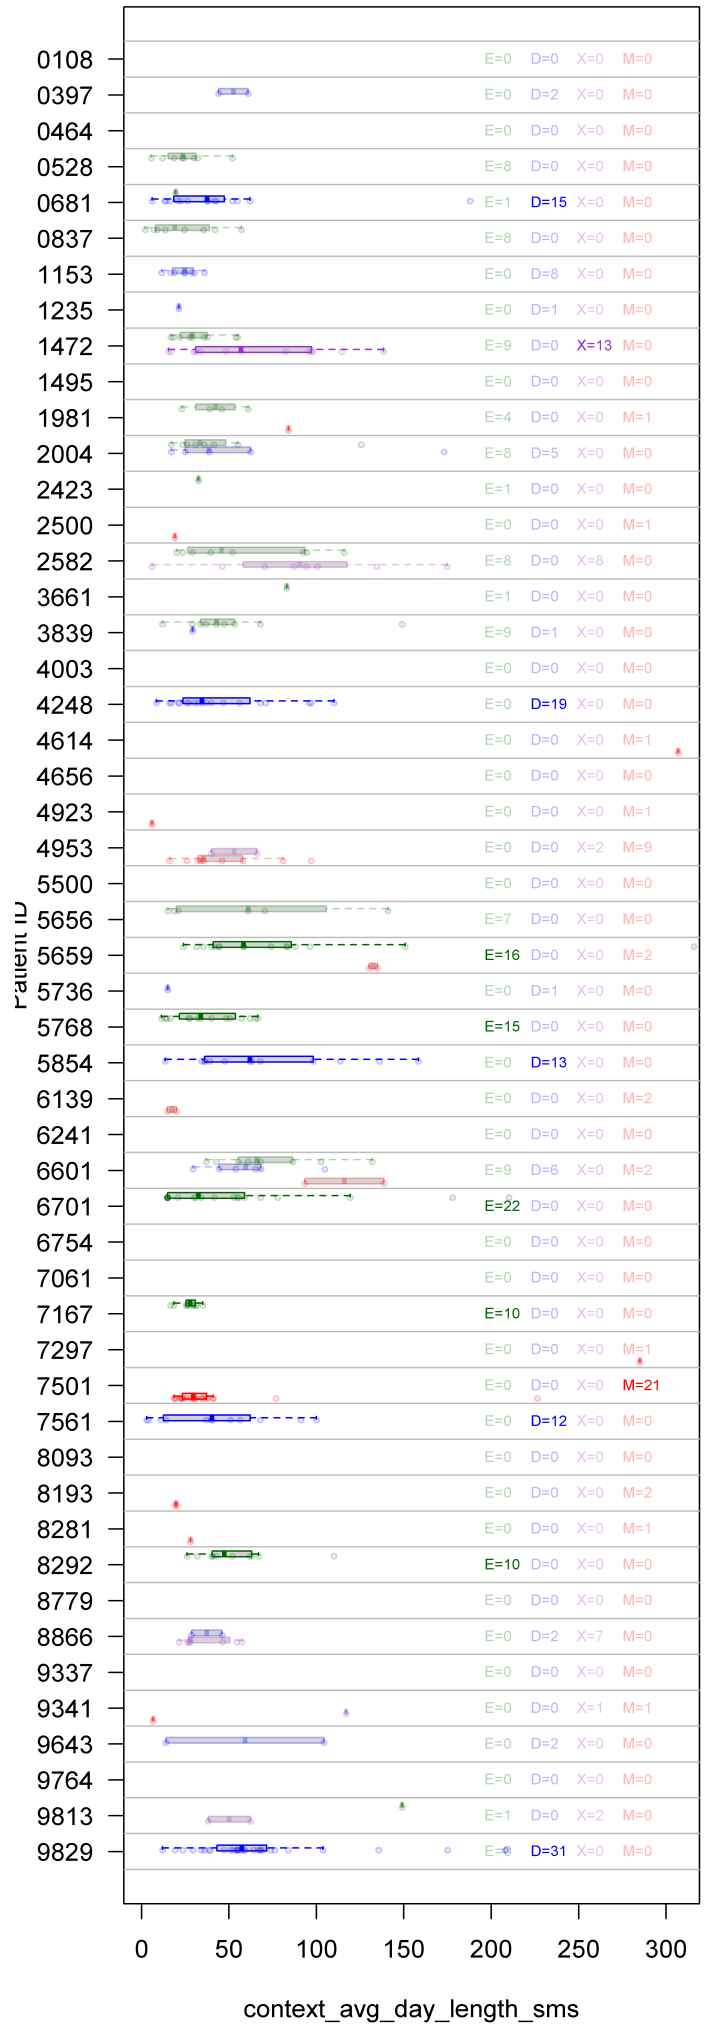

Supplement: jmir_v24i1e28647_app19.pdf [file jmir_v24i1e28647_app19.pdf]
