# Supplementary material for: Behavioral and Self-reported Data Collected From Smartphones for the Assessment of Depressive and Manic Symptoms in Patients With Bipolar Disorder: Prospective Observational Study
Source: PubMed Central journal article supplement (PMC8811705; doi:10.2196/28647), 2022-01-19
Supplement: jmir_v24i1e28647_app20.pdf [file jmir_v24i1e28647_app20.pdf]

Regression coefficients from mixed regression models regarding smartphone-based data and affective states (euthymia vs depressive/mixed/manic states) in BD patients assessed with the HDRS and YMRS for a longer period before the psychiatric assessment (14 days)<sup>a</sup>.

| Daily variable                                          | Euthymia vs Depression/Mania/Mixed state |                 |                      |               |                        |                             |
|---------------------------------------------------------|------------------------------------------|-----------------|----------------------|---------------|------------------------|-----------------------------|
|                                                         | Regression<br>coeff.                     | <i>P</i>        | Confidence intervals |               | No. of<br>observations | No. of<br>groups (patients) |
|                                                         |                                          |                 | Lower<br>limit       | Upper limit   |                        |                             |
| <b>Number of incoming answered calls</b>                | <b>-0.058</b>                            | <b>.03</b>      | <b>-0.111</b>        | <b>-0.005</b> | <b>1511</b>            | <b>52</b>                   |
| Duration of incoming calls [seconds/call]               | 0.000                                    | .21             | 0                    | 0.001         | 1275                   | 52                          |
| Standard deviation of duration of incoming calls [s]    | 0.001                                    | .11             | 0                    | 0.001         | 928                    | 49                          |
| Number of outgoing calls                                | 0.007                                    | .41             | -0.009               | 0.022         | 1511                   | 52                          |
| <b>Fraction of outgoing calls</b>                       | <b>1.012</b>                             | <b>.01</b>      | <b>0.218</b>         | <b>1.806</b>  | <b>1361</b>            | <b>52</b>                   |
| Duration of outgoing calls [s]                          | 0.001                                    | .08             | 0                    | 0.001         | 1361                   | 52                          |
| Standard deviation of duration of outgoing calls [s]    | 0.000                                    | .375            | 0                    | 0.001         | 1154                   | 51                          |
| Number of missed calls                                  | 0.043                                    | .22             | -0.026               | 0.112         | 1511                   | 52                          |
| <b>Fraction of missed calls</b>                         | <b>2.412</b>                             | <b>&lt;.001</b> | <b>1.083</b>         | <b>3.741</b>  | <b>875</b>             | <b>51</b>                   |
| <b>Number of sent text messages</b>                     | <b>0.021</b>                             | <b>.01</b>      | <b>0.005</b>         | <b>0.037</b>  | <b>1511</b>            | <b>52</b>                   |
| <b>Mean length of text messages [no. of characters]</b> | <b>0.010</b>                             | <b>.04</b>      | <b>0</b>             | <b>0.02</b>   | <b>343</b>             | <b>38</b>                   |
| <b>Self-assessment of sleep time [hours]</b>            | <b>-0.081</b>                            | <b>.30</b>      | <b>-0.236</b>        | <b>0.073</b>  | <b>409</b>             | <b>40</b>                   |
| <b>Self-assessment of mood</b>                          | <b>-0.617</b>                            | <b>&lt;.001</b> | <b>-0.945</b>        | <b>-0.288</b> | <b>408</b>             | <b>43</b>                   |

<sup>a</sup> Euthymic state was define as a Hamilton Depression Rating Scale 17-items (HDRS-17) score < 13 and a Young Mania Rating Scale (YMRS) score < 13. A depressive state was define as a HDRS-17 score ≥ 13 and an YMRS score < 13. Manic state was defined as an YMRS score ≥ 13. Mixed state with higher cut offs was excluded from this analysis due to the relatively small sample size. In total, only 19 patient-days of the mixed state were reported for 2 patients.
